# Supplementary material for: Relationship between Metabolomics Profile of Perilymph in Cochlear-Implanted Patients and Duration of Hearing Loss
Source: PubMed Central journal article supplement (PMC6918144; doi:10.3390/metabo9110262), 2019-11-01
Supplement: metabolites-09-00262-s001.pdf [file metabolites-09-00262-s001.pdf]

*Supplementary material* : 106 metabolites identified

| <b>Metabolite</b>             | <b>Chemical class</b>                     | <b>HMDB</b> |
|-------------------------------|-------------------------------------------|-------------|
| 1-OLEOYL-RAC-GLYCEROL         | Monoradylglycerol                         | HMDB0011567 |
| 3-METHOXY-L-TYROSINE          | Amino acids, peptides, and analogues      | HMDB0001434 |
| 5-OXO-L-PROLINE               | Carboxylic acids                          | HMDB0000267 |
| ADENOSINE                     | Purine nucleoside                         | HMDB0000050 |
| CITRULLINE                    | Carboxylic acids                          | HMDB0000904 |
| CORTISOL                      | Hydroxysteroids                           | HMDB0000063 |
| CREATINE                      | Carboxylic acids                          | HMDB0000064 |
| CREATININE                    | Amino acids, peptides and analogues       | HMDB0000562 |
| DL-5-HYDROXYLYSINE            | Amino acids, peptides, and analogues      | HMDB0000450 |
| ETHANOLAMINE                  | Amines                                    | HMDB0000149 |
| HYPOXANTHINE                  | Purines and purine derivatives            | HMDB0000157 |
| L-CARNITINE                   | Quaternary ammonium salts                 | HMDB0000062 |
| L-HISTIDINE                   | Amino acids, peptides and analogues       | HMDB0000177 |
| L-SERINE                      | Amino acids, peptides and analogues       | HMDB0000187 |
| N-ACETYL-L-LEUCINE            | Carboxylic acids                          | HMDB0011756 |
| N6, N6, N6-TRIMETHYL-L-LYSINE | Amino acids, peptides, and analogues      | HMDB0001325 |
| NICOTINAMIDE                  | Pyridinecarboxylic acids and derivatives  | HMDB0001406 |
| O-ACETYL-L-CARNITINE          | Fatty acids esters                        | HMDB0000201 |
| SN-GLYCERO-3-PHOSPHOCHOLINE   | Glycerophosphocholines                    | HMDB0000086 |
| TRIGONELLINE                  | Alkaloids and derivatives                 | HMDB0000875 |
| 2-HYDROXYPHENYLACETIC ACID    | Benzene and substitutes derivatives       | HMDB0000669 |
| 2-METHYLPROPANOATE            | Carboxylic acids and derivatives          | HMDB0001873 |
| 3-AMINO-4-HYDROXYBENZOIC ACID | Benzoic acids and derivatives             | HMDB0001476 |
| 3-HYDROXY-3-METHYLGLUTARATE   | Fatty acyls                               | HMDB0000355 |
| 3-HYDROXYANTHRANILATE         | Benzene and substitutes derivatives       | HMDB0001476 |
| 3-HYDROXYBUTANOIC ACID        | Beta hydroxy acids and derivatives        | HMDB0000357 |
| 3-METHYLGLUTARIC ACID         | Fatty acids and conjugates                | HMDB0000752 |
| PIMELIC ACID                  | Fatty acids and conjugates                | HMDB0000857 |
| ADIPIC ACID                   | Fatty acids and conjugates                | HMDB0000448 |
| ALPHA-D-GLUCOSE               | Carbohydrates and carbohydrate conjugates | HMDB0003345 |
| ALPHA-HYDROXYISOBUTYRIC ACID  | Hydroxy acids and derivatives             | HMDB0000729 |
| BETA-ALANINE                  | Amino acids, peptides and analogues       | HMDB0000056 |
| BUTANOATE                     | Fatty acyls                               | HMDB0000039 |
| D-PANTOTHENIC ACID            | Carboxylic acids and derivatives          | HMDB0000210 |
| D-RIBOSE-5-PHOSPHATE          | Organooxygen compounds                    | HMDB0001548 |
| GLUTARIC ACID                 | Carboxylic acids and derivatives          | HMDB0000661 |
| L-ARGININE                    | Amino acids, peptides and analogues       | HMDB0000517 |

|                                   |                                            |                      |
|-----------------------------------|--------------------------------------------|----------------------|
| L-ASPARAGINE                      | Carboxylic acids and derivatives           | HMDB0000168          |
| MANNITOL                          | Carbohydrates and carbohydrate conjugates  | HMDB0000765          |
| MONO-ETHYL MALONATE               | Carboxylic acids and derivatives           | HMDB0000576          |
| PENTANOATE                        | Fatty acids and conjugates                 | HMDB0000892          |
| S)-LACTATE                        | Hydroxy acids and derivatives              | HMDB0000190          |
| S.S)-TARTARIC ACID                | Carbohydrates and carbohydrate conjugates  | HMDB0029878          |
| SUBERIC ACID                      | Fatty acids and conjugates                 | HMDB0000893          |
| XANTHINE                          | Imidazopyrimidines                         | HMDB0000292          |
| 10-HYDROXYDECANOATE               | Medium-chain hydroxy acids and derivatives | HMDB0002203          |
| 1-AMINOCYCLOPROPANE-1-CARBOXYLATE | Carboxylic acids and derivatives           | HMDB0036458          |
| 2-DEOXY-D-GLUCOSE                 | Fatty alcohols                             | HMDB0062477          |
| GABA                              | Carboxylic acids and derivatives           | HMDB0000112          |
| 4-GUANIDINOBUTANOATE              | Carboxylic acids and derivatives           | HMDB0003464          |
| 4-HYDROXY-L-PROLINE               | Amino acids, peptides and analogues        | HMDB0000725          |
| ALPHA-AMINOADIPATE                | Carboxylic acids and derivatives           | HMDB0000510          |
| L-ALANINE                         | Amino acids, peptides and analogues        | HMDB0000161          |
| DEOXYCARNITINE                    | Fatty acids and conjugates                 | HMDB0001161          |
| DIETHANOLAMINE                    | Amines                                     | HMDB0004437          |
| L-MANNOSAMINE                     | Carbohydrates and carbohydrate conjugates  | HMDB0000230          |
| GLYCINE                           | Amino acids, peptides and analogues        | HMDB0000123          |
| GUANIDINOACETATE                  | Amino acids, peptides and analogues        | HMDB0000128          |
| HOMOSERINE                        | Carboxylic acids and derivatives           | HMDB0000719          |
| L-ANSERINE                        | Peptidomimetics                            | HMDB0000194          |
| L-GLUTAMINE                       | Carboxylic acids                           | HMDB0000641          |
| LL-2,6-DIAMINOHEPTANEDIOATE       | Carboxylic acids and derivatives           | HMDB0001370          |
| L-LYSINE                          | Amino acids, peptides and analogues        | HMDB0000182          |
| L-METHIONINE                      | Carboxylic acids and derivatives           | HMDB0000696          |
| L-PHENYLALANINE                   | Carboxylic acids and derivatives           | HMDB0000159          |
| L-PROLINE                         | Amino acids, peptides and analogues        | HMDB0000162          |
| L-THREONINE                       | Carboxylic acids and derivatives           | HMDB0000167          |
| L-VALINE                          | Amino acids, peptides and analogues        | HMDB0000883          |
| N(PAI)-METHYL-L-HISTIDINE         | Carboxylic acids and derivatives           | HMDB0000479          |
| N-ACETYL-L-ALANINE                | Carboxylic acids and derivatives           | HMDB0000766          |
| N-ACETYLPUTRESCINE                | Carboximidic acids and derivatives         | HMDB0002064          |
| CN,N,N TRIMETHYL LYSINE           | Amino acids, peptides, and analogues       | HMDB0001325          |
| OMEGA-HYDROXYDODECANOIC ACID      | Hydroxy acids and derivatives              | HMDB0002059          |
| PARAXANTHINE                      | Imidazopyrimidines                         | HMDB0001860          |
| PHOSPHOCHOLINE                    | Organonitrogen compounds                   | HMDB0001565          |
| RAC-GLYCEROL-1-MYRISTATE          | Monoradylglycerol                          | PubChem<br>CID 79050 |
| SEROTONIN                         | Tryptamines and derivatives                | HMDB0000259          |

|                               |                                           |             |
|-------------------------------|-------------------------------------------|-------------|
| SORBATE                       | Carbohydrates and carbohydrate conjugates | HMDB0000247 |
| URACIL                        | Pyrimidines and pyrimidine derivatives    | HMDB0000300 |
| 2-HYDROXYBUTYRIC ACID         | Alpha hydroxy acids and derivatives       | HMDB0000008 |
| 3-(4-HYDROXYPHENYL)LACTATE    | Phenylpropanoic acids                     | HMDB0000755 |
| 3-UREIDOPROPIONATE            | Organic carbonic acids and derivatives    | HMDB0000026 |
| 4-IMIDAZOLEACETIC ACID        | Azoles                                    | HMDB0002024 |
| 4-METHYL-2-OXOPENTANOIC ACID  | Short-chain keto acids and derivatives    | HMDB0000695 |
| 4-METHYL-2-OXOVALERIC ACID    | Short-chain keto acids and derivatives    | HMDB0000695 |
| 5-OXO-D-PROLINE               | Amino acids, peptides and analogues       | HMDB0000805 |
| ALLANTOIN                     | Imidazoles                                | HMDB0000462 |
| ALPHA-D-GALACTOSE-1-PHOSPHATE | Carbohydrates and carbohydrate conjugates | HMDB0000645 |
| CIS-4-HYDROXY-D-PROLINE       | Carboxylic acids and derivatives          | HMDB0060460 |
| D-GLUCONATE                   | Carbohydrates and carbohydrate conjugates | HMDB0000625 |
| D-GLUCURONIC ACID             | Organooxygen compounds                    | HMDB0000127 |
| D-LACTOSE                     | Carbohydrates and carbohydrate conjugates | HMDB0000825 |
| D-RIBOSE                      | Carbohydrates and carbohydrate conjugates | HMDB0000283 |
| ETHANOLAMINE PHOSPHATE        | Organic phosphoric acids and derivatives  | HMDB0000224 |
| GALACTITOL                    | Carbohydrates and carbohydrate conjugates | HMDB0000107 |
| INOSINE                       | Purine nucleoside                         | HMDB0000195 |
| L-ALLOTHREONINE               | Carboxylic acids and derivatives          | HMDB0004041 |
| L-ARABITOL                    | Organooxygen compounds                    | HMDB0001851 |
| L-CYSTINE                     | Carboxylic acids and derivatives          | HMDB0000192 |
| MALTOSE                       | Organooxygen compounds                    | HMDB0000163 |
| METHYL JASMONATE              | Fatty acyls                               | HMDB0036583 |
| METHYLMALONATE                | Carboxylic acids and derivatives          | HMDB0000202 |
| N-ACETYLNEURAMINATE           | Organooxygen compounds                    | HMDB0000230 |
| PANTOLACTONE                  | Gamma butyrolactones                      | HMDB0059876 |
| SUCCINATE                     | Dicarboxylic acids and derivatives        | HMDB0000254 |
| TAURINE                       | Organosulfonic acids and derivatives      | HMDB0000251 |
| THEOPHYLLINE                  | Imidazopyrimidines                        | HMDB0001889 |
